# Supplementary material for: Superior discharge energy density and efficiency in polymer nanocomposites induced by linear dielectric core–shell nanofibers
Source: Royal Society of Chemistry journal article supplement (doi:10.1039/c8tc04555k), 2018-11-28
Supplement: c8tc04555k1.pdf [file c8tc04555k1.pdf]

**Superior discharged energy density and efficiency in polymer nanocomposites induced by linear dielectric core-shell nanofibers**

Zhongbin Pan,<sup>\*abc</sup> Lingmin Yao,<sup>b</sup> Jinjun Liu,<sup>\*a</sup> Xiaoyan Liu,<sup>b</sup> Feipeng Pi,<sup>b</sup> Jianwen Chen,<sup>d</sup> Bo Shen<sup>c</sup> and Jiwei Zhai<sup>\*c</sup>

<sup>a</sup>School of Materials Science and Chemical Engineering, Ningbo University, Ningbo, Zhejiang, 315211, China.

<sup>b</sup>School of Physics and Electronic Engineering, Guangzhou University, Guangzhou, 510006, China.

<sup>c</sup>School of Materials Science & Engineering, Tongji University, 4800 Caoan Road, Shanghai 201804, China.

<sup>d</sup>School of Electronic and Information Engineering, Foshan University, Foshan, 528000, China.

\*E-mail: panzhongbin@163.com (Zhongbin Pan), apzhai@tongji.edu.cn (Jiwei Zhai), liujinjun1@nbu.edu.cn (Jinjun Liu)

## Supporting Information 1

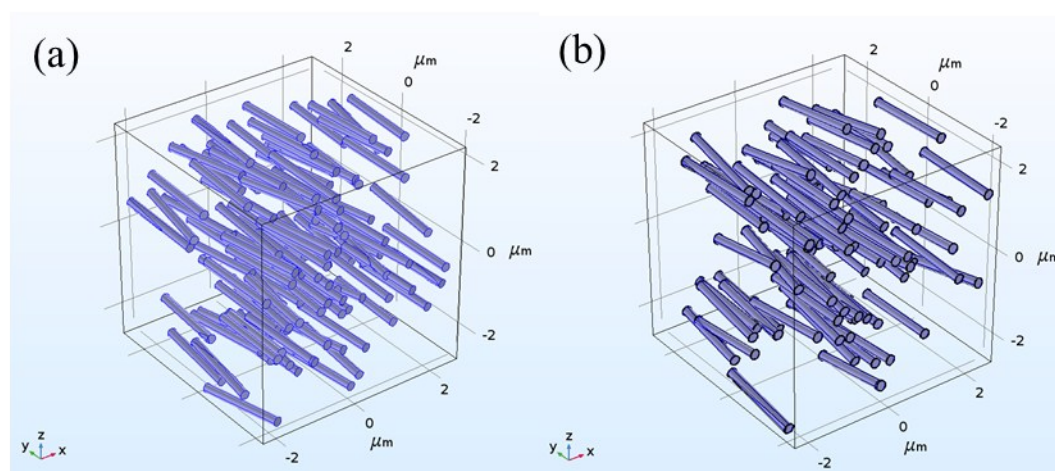

**Figure S1** Three-dimensional models of the simulation system for 5 vol.% ST NFs/PVDF and 5 vol.% ST@AO NFs /PVDF composite films.

## Supporting Information 2

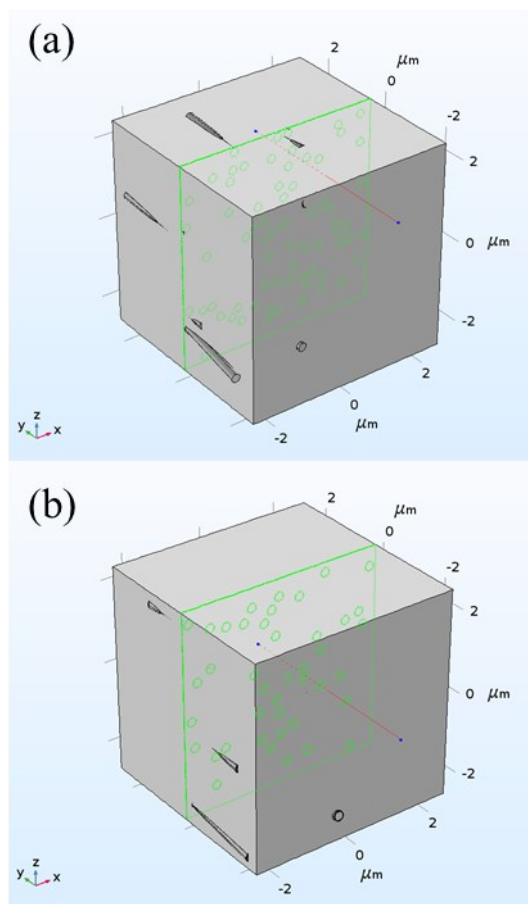

**Figure S2** Cross-section images (X-directions) distribution of leakage current density, electric potential, and electric field strength simulated for the 5 vol% ST NFs/PVDF composite films (a) and 5 vol% ST@AO NFs/PVDF composite films (b).

### Supporting Information 3

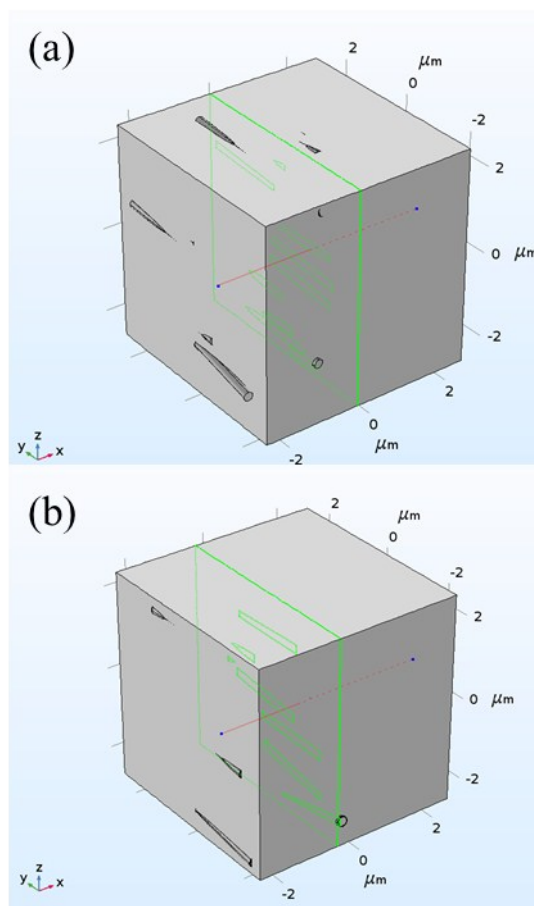

**Figure S3** Cross-section images (Y-directions) distribution of leakage current density, electric potential, and electric field strength simulated for the 5 vol% ST NFs/PVDF composite films (a) and 5 vol% ST@AO NFs/PVDF composite films (b).

## Supporting Information 4

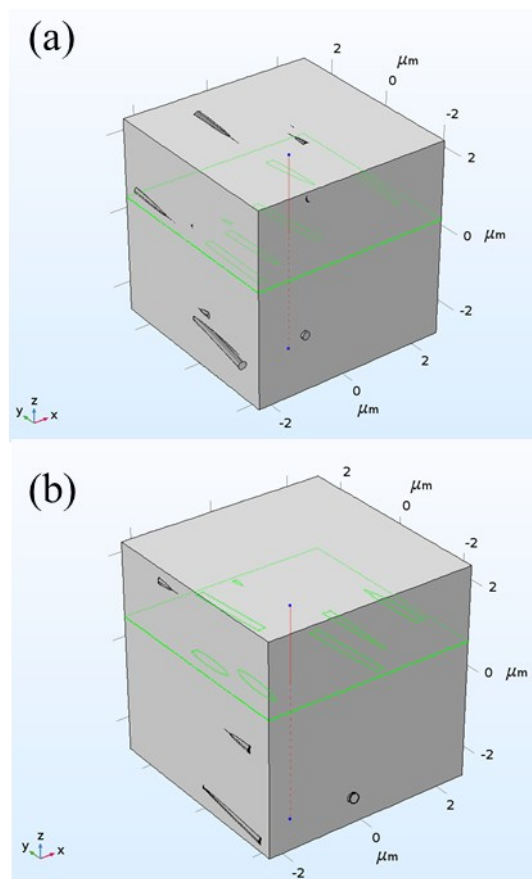

**Figure S4** Cross-section images (Z-directions) distribution of leakage current density, electric potential, and electric field strength simulated for the 5 vol% ST NFs/PVDF composite films (a) and 5 vol% ST@AO NFs/PVDF composite films (b).

## Supporting Information 5

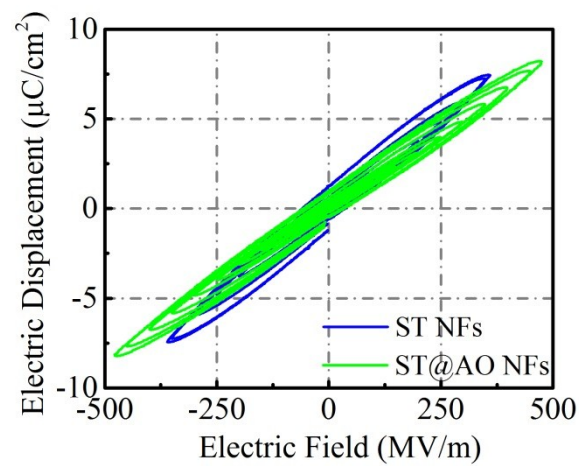

**Figure S5** D-E curves of 5 vol% ST NFs/PVDF composite films and 5 vol% ST@AO NFs/PVDF composite films.

## Supporting Information 6

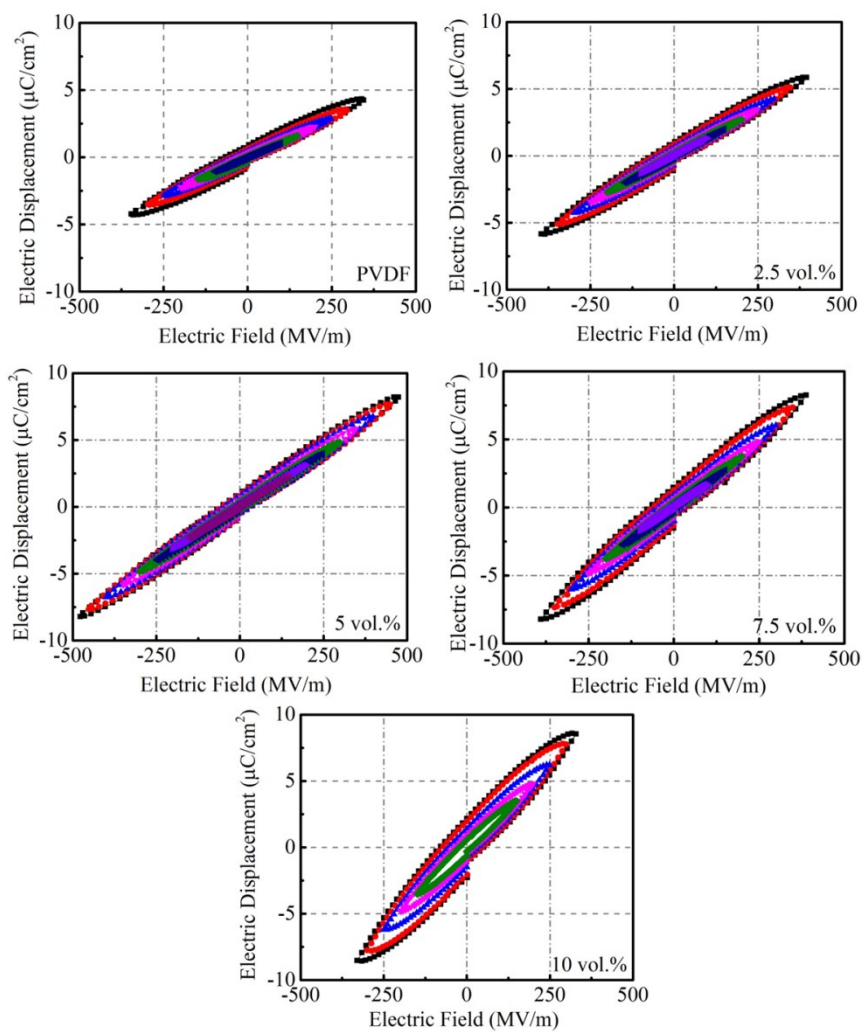

**Figure S6** D-E curves of pure PVDF and ST@AO NFs/PVDF composite films with different contents fillers.
